# Supplementary figures and images for: pH dependent reactivity of boehmite surfaces from first principles molecular dynamics
Source: Royal Society of Chemistry journal article supplement (doi:10.1039/d2cp00534d), 2022-01-01

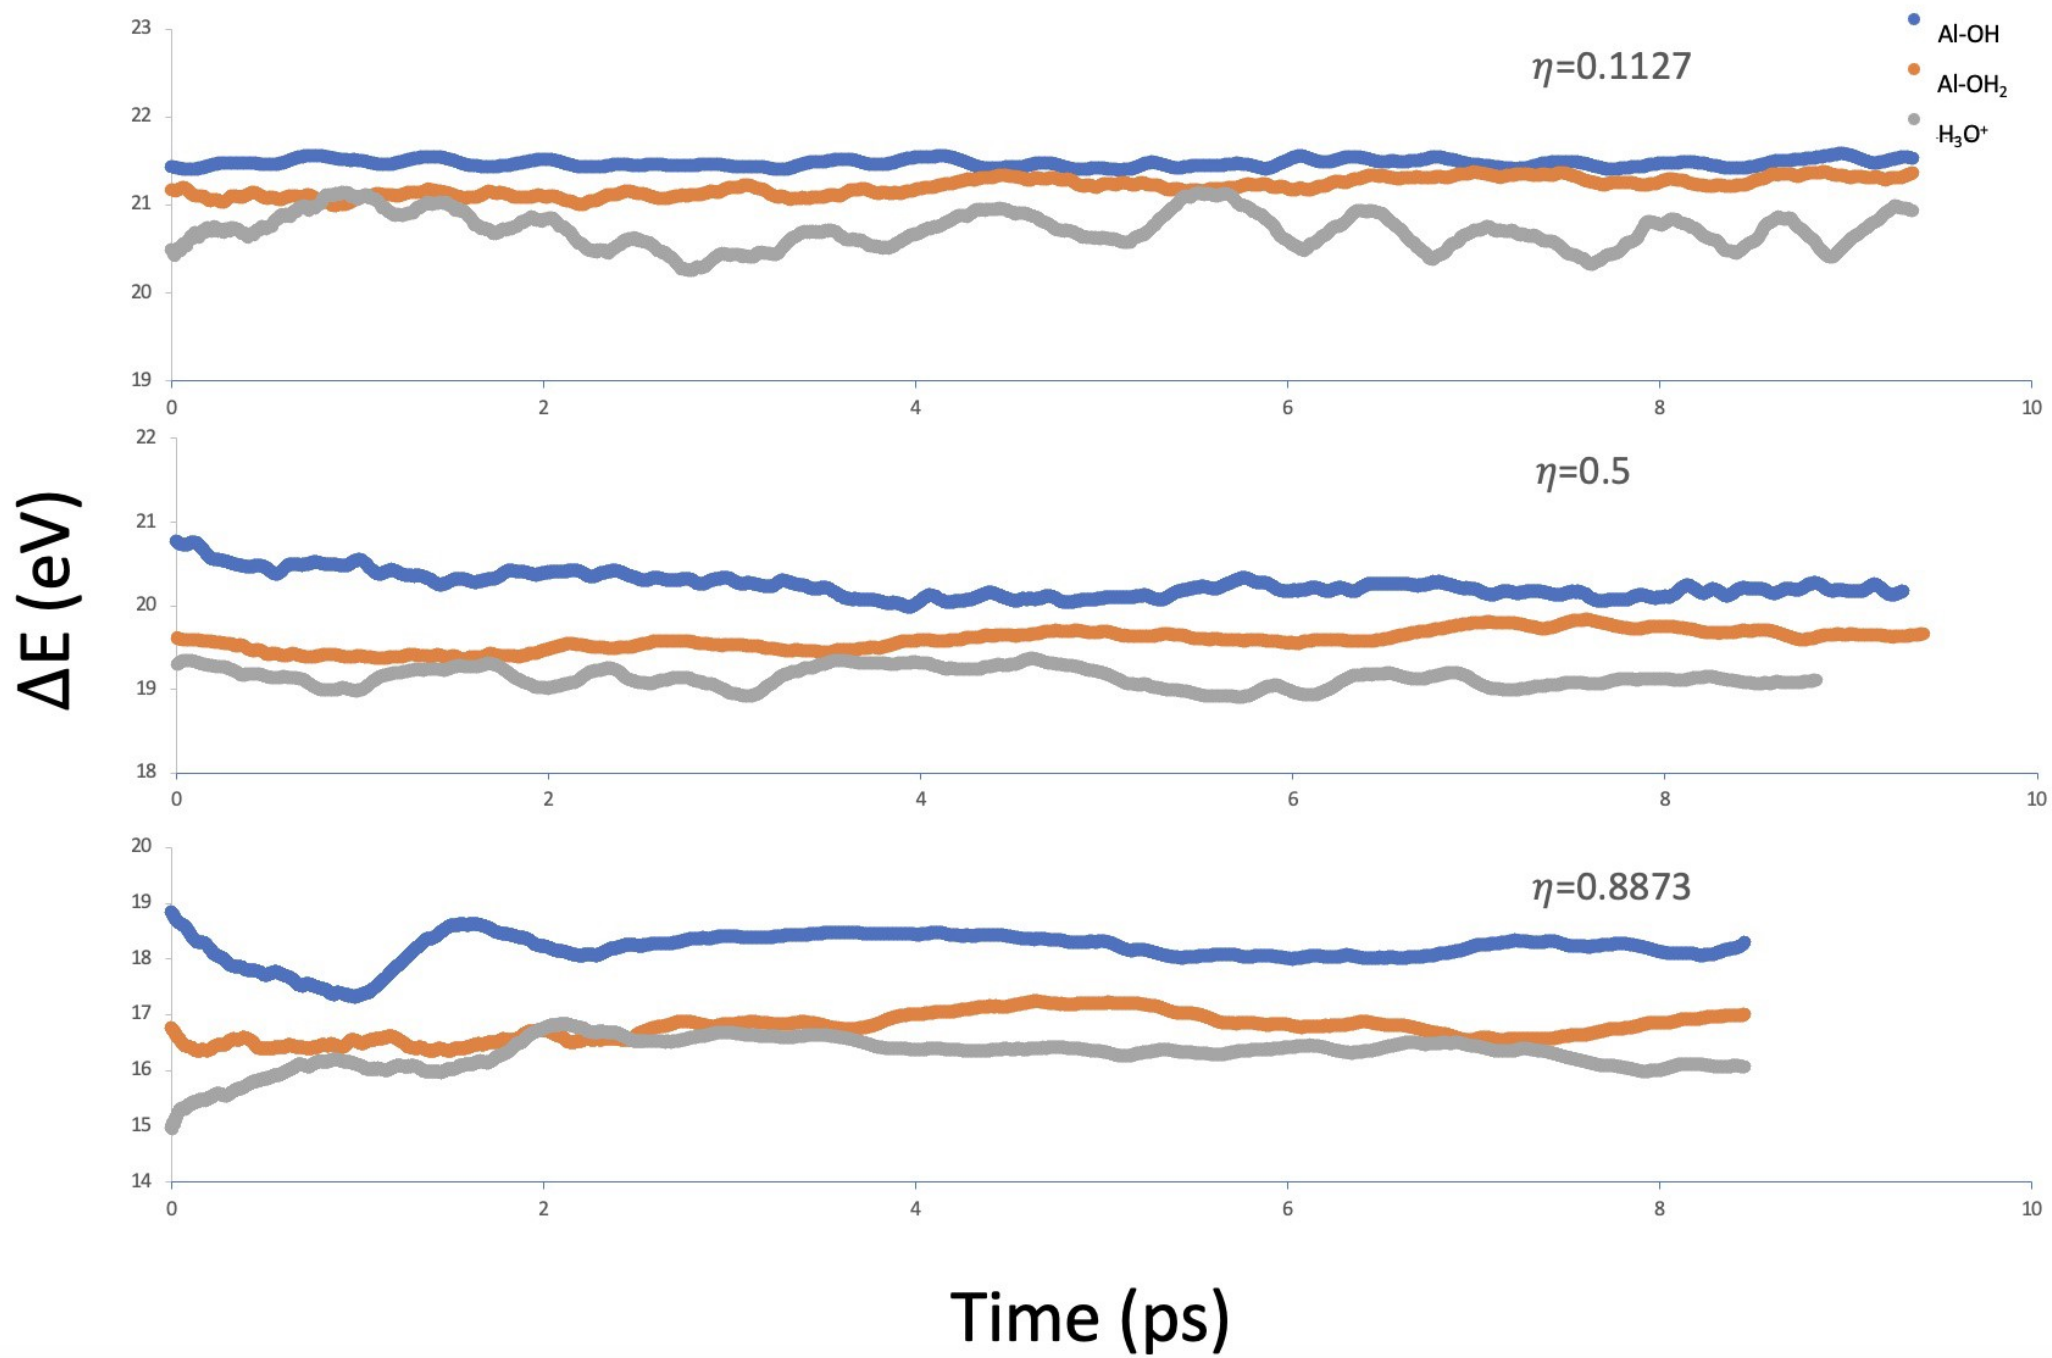

Supplement: d2cp00534d1.pdf [file d2cp00534d1.pdf]
